# Supplementary material
Source: publisher figshare collection journal article supplement (https://plos.figshare.com/articles/dataset/_/137018)
Supplement: Supplementary file [file 1]

**Table S1:** Species list. It is indicated whether species are documented in the shark fin trade (FT), and which ecomorphotype (following Compagno 1990b) they represent.

| <b>Species name</b>       | <b>FT</b> | <b>Ecomorphotype</b> | <b>Source for species included in the fin trade</b> |
|---------------------------|-----------|----------------------|-----------------------------------------------------|
| Aculeola_nigra            | no        | bathic               |                                                     |
| Alopias_pelagicus         | yes       | macroceanic          | Clarke et al. 2006 (Ecol. Lett. 9:1115-1126)        |
| Alopias_superciliosus     | yes       | macroceanic          | Clarke et al. 2006 (Ecol. Lett. 9:1115-1126)        |
| Alopias_vulpinus          | yes       | macroceanic          | Clarke et al. 2006 (Ecol. Lett. 9:1115-1126)        |
| Apristurus_albisoma       | no        | rhynchobathic        |                                                     |
| Apristurus_ampliceps      | no        | rhynchobathic        |                                                     |
| Apristurus_aphyodes       | no        | rhynchobathic        |                                                     |
| Apristurus_australis      | no        | rhynchobathic        |                                                     |
| Apristurus_brunneus       | no        | rhynchobathic        |                                                     |
| Apristurus_bucephalus     | no        | rhynchobathic        |                                                     |
| Apristurus_canutus        | no        | rhynchobathic        |                                                     |
| Apristurus_exsanguis      | no        | rhynchobathic        |                                                     |
| Apristurus_fedorovi       | no        | rhynchobathic        |                                                     |
| Apristurus_gibbosus       | no        | rhynchobathic        |                                                     |
| Apristurus_herklotsi      | no        | rhynchobathic        |                                                     |
| Apristurus_indicus        | no        | rhynchobathic        |                                                     |
| Apristurus_internatus     | no        | rhynchobathic        |                                                     |
| Apristurus_investigatoris | no        | rhynchobathic        |                                                     |
| Apristurus_japonicus      | no        | rhynchobathic        |                                                     |
| Apristurus_kampae         | no        | rhynchobathic        |                                                     |
| Apristurus_laurussoni     | no        | rhynchobathic        |                                                     |
| Apristurus_longicephalus  | no        | rhynchobathic        |                                                     |
| Apristurus_macrorhynchus  | no        | rhynchobathic        |                                                     |
| Apristurus_macrostomus    | no        | rhynchobathic        |                                                     |
| Apristurus_manis          | no        | rhynchobathic        |                                                     |
| Apristurus_melanoasper    | no        | rhynchobathic        |                                                     |
| Apristurus_microps        | no        | rhynchobathic        |                                                     |
| Apristurus_micropterygius | no        | rhynchobathic        |                                                     |

|                          |    |               |
|--------------------------|----|---------------|
| Apristurus_nasutus       | no | rhynchobathic |
| Apristurus_parvipinnis   | no | rhynchobathic |
| Apristurus_pinguis       | no | rhynchobathic |
| Apristurus_platyrhynchus | no | rhynchobathic |
| Apristurus_profundorum   | no | rhynchobathic |
| Apristurus_riveri        | no | rhynchobathic |
| Apristurus_saldanha      | no | rhynchobathic |
| Apristurus_sibogae       | no | rhynchobathic |
| Apristurus_sinensis      | no | rhynchobathic |
| Apristurus_spongiceps    | no | rhynchobathic |
| Apristurus_stenseni      | no | rhynchobathic |
| Asymbolus_analis         | no | leptobenthic  |
| Asymbolus_funebris       | no | leptobenthic  |
| Asymbolus_galacticus     | no | leptobenthic  |
| Asymbolus_occiduus       | no | leptobenthic  |
| Asymbolus_pallidus       | no | leptobenthic  |
| Asymbolus_parvus         | no | leptobenthic  |
| Asymbolus_rubiginosus    | no | leptobenthic  |
| Asymbolus_submaculatus   | no | leptobenthic  |
| Asymbolus_vincenti       | no | leptobenthic  |
| Atelomycterus_baliensis  | no | leptobenthic  |
| Atelomycterus_fasciatus  | no | leptobenthic  |
| Atelomycterus_macleayi   | no | leptobenthic  |
| Atelomycterus_marmoratus | no | leptobenthic  |
| Atelomycterus_marnkalha  | no | leptobenthic  |
| Aulohalaelurus_kanakorum | no | leptobenthic  |
| Aulohalaelurus_labiosus  | no | leptobenthic  |
| Brachaelurus_colcloughi  | no | probenthic    |
| Brachaelurus_waddi       | no | probenthic    |
| Bythaelurus_alcocki      | no | bathic        |
| Bythaelurus_canescens    | no | bathic        |
| Bythaelurus_clevai       | no | bathic        |

|                              |     |             |                                                                                                                                                                                                                                                                                                                                                                                                                                |
|------------------------------|-----|-------------|--------------------------------------------------------------------------------------------------------------------------------------------------------------------------------------------------------------------------------------------------------------------------------------------------------------------------------------------------------------------------------------------------------------------------------|
| Bythaelurus_dawsoni          | no  | bathic      |                                                                                                                                                                                                                                                                                                                                                                                                                                |
| Bythaelurus_hispidus         | no  | bathic      |                                                                                                                                                                                                                                                                                                                                                                                                                                |
| Bythaelurus_immaculatus      | no  | bathic      |                                                                                                                                                                                                                                                                                                                                                                                                                                |
| Bythaelurus_incanus          | no  | bathic      |                                                                                                                                                                                                                                                                                                                                                                                                                                |
| Bythaelurus_lutarius         | no  | bathic      |                                                                                                                                                                                                                                                                                                                                                                                                                                |
| Bythaelurus_spB              | no  | bathic      |                                                                                                                                                                                                                                                                                                                                                                                                                                |
| Carcharhinus_acronotus       | no  | littoral    |                                                                                                                                                                                                                                                                                                                                                                                                                                |
| Carcharhinus_albimarginatus  | yes | eurytrophic | Compagno et al. 2005 (Sharks of the World, Collins, London), Anderson & Ahmed 1993 (The Shark Fisheries in the Maldives, Ministry of Fisheries and Agriculture of the Maldives and FAO, Male)                                                                                                                                                                                                                                  |
| Carcharhinus_altimus         | yes | eurytrophic | Anderson & Ahmed 1993 (The Shark Fisheries in the Maldives, Ministry of Fisheries and Agriculture of the Maldives and FAO, Male)                                                                                                                                                                                                                                                                                               |
| Carcharhinus_amblyrhynchoids | yes | littoral    | Last & Stevens 2009 (Sharks and Rays of Australia, 2nd edition, Harvard University Press, Cambridge)                                                                                                                                                                                                                                                                                                                           |
| Carcharhinus_amblyrhynchos   | yes | littoral    | Last & Stevens 2009 (Sharks and Rays of Australia, 2nd edition, Harvard University Press, Cambridge)                                                                                                                                                                                                                                                                                                                           |
| Carcharhinus_amboinensis     | yes | eurytrophic | Last & Stevens 2009 (Sharks and Rays of Australia, 2nd edition, Harvard University Press, Cambridge)                                                                                                                                                                                                                                                                                                                           |
| Carcharhinus_borneensis      | no  | littoral    |                                                                                                                                                                                                                                                                                                                                                                                                                                |
| Carcharhinus_brachyurus      | yes | eurytrophic | L.O. Lucifora (pers. Obs.)                                                                                                                                                                                                                                                                                                                                                                                                     |
| Carcharhinus_brevipinna      | yes | eurytrophic | Last & Stevens 2009 (Sharks and Rays of Australia, 2nd edition, Harvard University Press, Cambridge)                                                                                                                                                                                                                                                                                                                           |
| Carcharhinus_cautus          | no  | littoral    |                                                                                                                                                                                                                                                                                                                                                                                                                                |
| Carcharhinus_dussumieri      | yes | littoral    | Last & Stevens 2009 (Sharks and Rays of Australia, 2nd edition, Harvard University Press, Cambridge)                                                                                                                                                                                                                                                                                                                           |
| Carcharhinus_falciformis     | yes | macroceanic | Clarke et al. 2006 (Ecol. Lett. 9:1115-1126)                                                                                                                                                                                                                                                                                                                                                                                   |
| Carcharhinus_fitzroyensis    | no  | littoral    |                                                                                                                                                                                                                                                                                                                                                                                                                                |
| Carcharhinus_galapagensis    | yes | eurytrophic | Dalzell et al. 2008 (in: Sharks of the Open Ocean, Camhi et al. Eds, pp. 268-274, Blackwell, Oxford)                                                                                                                                                                                                                                                                                                                           |
| Carcharhinus_hemiodon        | no  | littoral    |                                                                                                                                                                                                                                                                                                                                                                                                                                |
| Carcharhinus_isodon          | no  | littoral    |                                                                                                                                                                                                                                                                                                                                                                                                                                |
| Carcharhinus_leiodon         | no  | littoral    |                                                                                                                                                                                                                                                                                                                                                                                                                                |
| Carcharhinus_leucas          | yes | eurytrophic | Clarke et al. 2006 (Ecol. Lett. 9:1115-1126)<br>Compagno et al. 2005 (Sharks of the World, Collins, London), Anderson & Ahmed 1993 (The Shark Fisheries in the Maldives, Ministry of Fisheries and Agriculture of the Maldives and FAO, Male), White et al. 2006 (Economically Important Sharks and Rays of Indonesia, Australian Centre for International Agricultural Research, Canberra)                                    |
| Carcharhinus_limbatus        | yes | eurytrophic |                                                                                                                                                                                                                                                                                                                                                                                                                                |
| Carcharhinus_longimanus      | yes | macroceanic | Clarke et al. 2006 (Ecol. Lett. 9:1115-1126)                                                                                                                                                                                                                                                                                                                                                                                   |
| Carcharhinus_macloti         | yes | littoral    | White et al. 2006 (Economically Important Sharks and Rays of Indonesia, Australian Centre for International Agricultural Research, Canberra)<br>White et al. 2006 (Economically Important Sharks and Rays of Indonesia, Australian Centre for International Agricultural Research, Canberra), Anderson & Ahmed 1993 (The Shark Fisheries in the Maldives, Ministry of Fisheries and Agriculture of the Maldives and FAO, Male) |
| Carcharhinus_melanopterus    | yes | littoral    |                                                                                                                                                                                                                                                                                                                                                                                                                                |
| Carcharhinus_obscurus        | yes | eurytrophic | Clarke et al. 2006 (Ecol. Lett. 9:1115-1126)                                                                                                                                                                                                                                                                                                                                                                                   |

|                             |     |              |                                                                                                                                                   |
|-----------------------------|-----|--------------|---------------------------------------------------------------------------------------------------------------------------------------------------|
| Carcharhinus_perezi         | yes | eurytrophic  | Compagno et al. 2005 (Sharks of the World, Collins, London)                                                                                       |
| Carcharhinus_plumbeus       | yes | eurytrophic  | Clarke et al. 2006 (Ecol. Lett. 9:1115-1126)                                                                                                      |
| Carcharhinus_porosus        | no  | littoral     |                                                                                                                                                   |
| Carcharhinus_sealei         | yes | littoral     | White et al. 2006 (Economically Important Sharks and Rays of Indonesia, Australian Centre for International Agricultural Research, Canberra)      |
| Carcharhinus_signatus       | yes | eurytrophic  | Santana et al. 2009 (In: The Conservation Status of Pelagic Sharks and Rays, Camhi et al. Eds., IUCN, Oxford)                                     |
| Carcharhinus_sorrah         | yes | littoral     | Last & Stevens 2009 (Sharks and Rays of Australia, 2nd edition, Harvard University Press, Cambridge)                                              |
| Carcharhinus_spA            | no  | littoral     |                                                                                                                                                   |
| Carcharhinus_tilstoni       | no  | littoral     |                                                                                                                                                   |
| Carcharias_taurus           | yes | eurytrophic  | L.O. Lucifora (pers. Obs.)                                                                                                                        |
| Carcharodon_carcharias      | yes | archipelagic | Clarke 2004 (Shark Products Trade in Hong Kong and Mainland China and Implementation of the CITES Shark. Listings. TRAFFIC East Asia, Hong Kong.) |
| Centrophorus_acus           | no  | bathic       |                                                                                                                                                   |
| Centrophorus_atromarginatus | no  | bathic       |                                                                                                                                                   |
| Centrophorus_granulosus     | no  | bathic       |                                                                                                                                                   |
| Centrophorus_harrissoni     | no  | bathic       |                                                                                                                                                   |
| Centrophorus_isodon         | no  | bathic       |                                                                                                                                                   |
| Centrophorus_lusitanicus    | no  | bathic       |                                                                                                                                                   |
| Centrophorus_moluccensis    | no  | bathic       |                                                                                                                                                   |
| Centrophorus_niaukang       | no  | bathic       |                                                                                                                                                   |
| Centrophorus_seychellorum   | no  | bathic       |                                                                                                                                                   |
| Centrophorus_spA            | no  | bathic       |                                                                                                                                                   |
| Centrophorus_squamosus      | no  | bathic       |                                                                                                                                                   |
| Centrophorus_tesselatus     | no  | bathic       |                                                                                                                                                   |
| Centrophorus_westraliensis  | no  | bathic       |                                                                                                                                                   |
| Centrophorus_zeehaani       | no  | bathic       |                                                                                                                                                   |
| Centroscyllium_excelsum     | no  | bathic       |                                                                                                                                                   |
| Centroscyllium_fabricii     | no  | bathic       |                                                                                                                                                   |
| Centroscyllium_granulatum   | no  | bathic       |                                                                                                                                                   |
| Centroscyllium_kamoharai    | no  | bathic       |                                                                                                                                                   |
| Centroscyllium_nigrum       | no  | bathic       |                                                                                                                                                   |
| Centroscyllium_ornatum      | no  | bathic       |                                                                                                                                                   |
| Centroscyllium_ritteri      | no  | bathic       |                                                                                                                                                   |
| Centrosymnus_coelolepis     | no  | bathic       |                                                                                                                                                   |

|                                |     |                     |                                                             |
|--------------------------------|-----|---------------------|-------------------------------------------------------------|
| Centroscymnus_owstoni          | no  | bathic              |                                                             |
| Centroselachus_crepidater      | no  | bathic              |                                                             |
| Cephaloscyllium_albipinnum     | no  | probenthic          |                                                             |
| Cephaloscyllium_circulopullum  | no  | probenthic          |                                                             |
| Cephaloscyllium_cooki          | no  | probenthic          |                                                             |
| Cephaloscyllium_fasciatum      | no  | probenthic          |                                                             |
| Cephaloscyllium_hiscosellum    | no  | probenthic          |                                                             |
| Cephaloscyllium_isabellum      | no  | probenthic          |                                                             |
| Cephaloscyllium_laticeps       | no  | probenthic          |                                                             |
| Cephaloscyllium_maculatum      | no  | probenthic          |                                                             |
| Cephaloscyllium_pardelotum     | no  | probenthic          |                                                             |
| Cephaloscyllium_pictum         | no  | probenthic          |                                                             |
| Cephaloscyllium_sarawakensis   | no  | probenthic          |                                                             |
| Cephaloscyllium_signourum      | no  | probenthic          |                                                             |
| Cephaloscyllium_silasi         | no  | probenthic          |                                                             |
| Cephaloscyllium_sp_Phillipines | no  | probenthic          |                                                             |
| Cephaloscyllium_sp_Sokotra     | no  | probenthic          |                                                             |
| Cephaloscyllium_speccum        | no  | probenthic          |                                                             |
| Cephaloscyllium_sufflans       | no  | probenthic          |                                                             |
| Cephaloscyllium_umbratile      | no  | probenthic          |                                                             |
| Cephaloscyllium_variegatum     | no  | probenthic          |                                                             |
| Cephaloscyllium_ventriosum     | no  | probenthic          |                                                             |
| Cephaloscyllium_zebrum         | no  | probenthic          |                                                             |
| Cephalurus_cephalus            | no  | anoxybathic         |                                                             |
| Cephalurus_spA                 |     | anoxybathic         |                                                             |
| Cetorhinus_maximus             | yes | tachypelagic_filter | Compagno et al. 2005 (Sharks of the World, Collins, London) |
| Chaenogaleus_macrostoma        | no  | littoral            |                                                             |
| Chiloscyllium_arabicum         | no  | leptobenthic        |                                                             |
| Chiloscyllium_burmensis        | no  | leptobenthic        |                                                             |
| Chiloscyllium_griseum          | no  | leptobenthic        |                                                             |
| Chiloscyllium_hasselti         | no  | leptobenthic        |                                                             |
| Chiloscyllium_indicum          | no  | leptobenthic        |                                                             |

|                                   |    |               |
|-----------------------------------|----|---------------|
| <i>Chiloscyllium plagiosum</i>    | no | leptobenthic  |
| <i>Chiloscyllium punctatum</i>    | no | leptobenthic  |
| <i>Chlamydoselachus anguineus</i> | no | anguilloid    |
| <i>Chlamydoselachus spA</i>       | no | anguilloid    |
| <i>Cirrhigaleus asper</i>         | no | littoral      |
| <i>Cirrhigaleus australis</i>     | no | littoral      |
| <i>Cirrhigaleus barbifer</i>      | no | littoral      |
| <i>Cirrhoscyllium exolitum</i>    | no | leptobenthic  |
| <i>Cirrhoscyllium formosanum</i>  | no | leptobenthic  |
| <i>Cirrhoscyllium japonicum</i>   | no | leptobenthic  |
| <i>Ctenacis fehmanni</i>          | no | littoral      |
| <i>Dalatias licha</i>             | no | bathic        |
| <i>Deania calcea</i>              | no | rhynchobathic |
| <i>Deania hystricosa</i>          | no | rhynchobathic |
| <i>Deania profundorum</i>         | no | rhynchobathic |
| <i>Deania quadrispinosum</i>      | no | rhynchobathic |
| <i>Echinorhinus brucus</i>        | no | bathic        |
| <i>Echinorhinus cookei</i>        | no | bathic        |
| <i>Eridacnis barbouri</i>         | no | leptobenthic  |
| <i>Eridacnis radcliffei</i>       | no | leptobenthic  |
| <i>Eridacnis sinuans</i>          | no | leptobenthic  |
| <i>Etmopterus baxteri</i>         | no | bathic        |
| <i>Etmopterus bigelowi</i>        | no | bathic        |
| <i>Etmopterus brachyurus</i>      | no | bathic        |
| <i>Etmopterus bullisi</i>         | no | bathic        |
| <i>Etmopterus burgessi</i>        | no | bathic        |
| <i>Etmopterus carteri</i>         | no | bathic        |
| <i>Etmopterus caudistigmus</i>    | no | bathic        |
| <i>Etmopterus decacuspoidatus</i> | no | bathic        |
| <i>Etmopterus dianthus</i>        | no | bathic        |
| <i>Etmopterus dislineatus</i>     | no | bathic        |
| <i>Etmopterus evansi</i>          | no | bathic        |

|                                      |     |                 |                                                             |
|--------------------------------------|-----|-----------------|-------------------------------------------------------------|
| <i>Etmopterus_fusus</i>              | no  | bathic          |                                                             |
| <i>Etmopterus_gracilispinis</i>      | no  | bathic          |                                                             |
| <i>Etmopterus_granulosus</i>         | no  | bathic          |                                                             |
| <i>Etmopterus_hillianus</i>          | no  | bathic          |                                                             |
| <i>Etmopterus_litvinovi</i>          | no  | bathic          |                                                             |
| <i>Etmopterus_lucifer</i>            | no  | bathic          |                                                             |
| <i>Etmopterus_molleri</i>            | no  | bathic          |                                                             |
| <i>Etmopterus_perryi</i>             | no  | bathic          |                                                             |
| <i>Etmopterus_polli</i>              | no  | bathic          |                                                             |
| <i>Etmopterus_princeps</i>           | no  | bathic          |                                                             |
| <i>Etmopterus_pseudosqualiolus</i>   | no  | bathic          |                                                             |
| <i>Etmopterus_pusillus</i>           | no  | bathic          |                                                             |
| <i>Etmopterus_pycnolepis</i>         | no  | bathic          |                                                             |
| <i>Etmopterus_robinsi</i>            | no  | bathic          |                                                             |
| <i>Etmopterus_schultzi</i>           | no  | bathic          |                                                             |
| <i>Etmopterus_sentosus</i>           | no  | bathic          |                                                             |
| <i>Etmopterus_spA</i>                | no  | bathic          |                                                             |
| <i>Etmopterus_spinax</i>             | no  | bathic          |                                                             |
| <i>Etmopterus_splendidus</i>         | no  | bathic          |                                                             |
| <i>Etmopterus_unicolor</i>           | no  | bathic          |                                                             |
| <i>Etmopterus_villosus</i>           | no  | bathic          |                                                             |
| <i>Etmopterus_virens</i>             | no  | bathic          |                                                             |
| <i>Eucrossorhinus_dasypogon</i>      | no  | squatinobenthic |                                                             |
| <i>Euprotomicroides_zantedeschia</i> | no  | microceanic     |                                                             |
| <i>Euprotomicrus_bispinatus</i>      | no  | microceanic     |                                                             |
| <i>Eusphyra_blochii</i>              | no  | sphyrnid        |                                                             |
| <i>Figaro_boardmani</i>              | no  | probenthic      |                                                             |
| <i>Figaro_striatus</i>               | no  | probenthic      |                                                             |
| <i>Furgaleus_macki</i>               | no  | teuthitrophic   |                                                             |
| <i>Galeocerdo_cuvier</i>             | yes | eurytrophic     | Clarke et al. 2006 (Ecol. Lett. 9:1115-1126)                |
| <i>Galeorhinus_galeus</i>            | yes | littoral        | Compagno et al. 2005 (Sharks of the World, Collins, London) |
| <i>Galeus_antillensis</i>            |     | probenthic      |                                                             |

no

|                        |    |              |
|------------------------|----|--------------|
| Galeus_arae            | no | probenthic   |
| Galeus_atlanticus      | no | probenthic   |
| Galeus_cadenati        | no | probenthic   |
| Galeus_eastmani        | no | probenthic   |
| Galeus_gracilis        | no | probenthic   |
| Galeus_longirostris    | no | probenthic   |
| Galeus_melastomus      | no | probenthic   |
| Galeus_mincaronei      | no | probenthic   |
| Galeus_murinus         | no | probenthic   |
| Galeus_nipponensis     | no | probenthic   |
| Galeus_piperatus       | no | probenthic   |
| Galeus_polli           | no | probenthic   |
| Galeus_priapus         | no | probenthic   |
| Galeus_sauteri         | no | probenthic   |
| Galeus_schultzi        | no | probenthic   |
| Galeus_sp1             | no | probenthic   |
| Galeus_springeri       | no | probenthic   |
| GenusA_spA             | no | bathic       |
| Ginglymostoma_cirratum | no | littoral     |
| Glyphis_gangeticus     | no | eurytrophic  |
| Glyphis_garricki       | no | eurytrophic  |
| Glyphis_glyphis        | no | eurytrophic  |
| Glyphis_siamensis      | no | eurytrophic  |
| Glyphis_spB            | no | eurytrophic  |
| Gogolia_filewoodi      | no | probenthic   |
| Gollum_attenuatus      | no | bathic       |
| Gollum_spA             | no | bathic       |
| Gollum_spB             | no | bathic       |
| Halaelurus_boesemani   | no | leptobenthic |
| Halaelurus_buergeri    | no | leptobenthic |
| Halaelurus_lineatus    | no | leptobenthic |
| Halaelurus_maculosus   | no | leptobenthic |



|                              |     |               |
|------------------------------|-----|---------------|
| Halaelurus_natalensis        | no  | leptobenthic  |
| Halaelurus_quagga            | no  | leptobenthic  |
| Halaelurus_sellus            | no  | leptobenthic  |
| Haploblepharus_edwardsi      | no  | probenthic    |
| Haploblepharus_fuscus        | no  | probenthic    |
| Haploblepharus_kistnasamyi   | no  | probenthic    |
| Haploblepharus_pictus        | no  | probenthic    |
| Hemiscyllium_galei           | no  | leptobenthic  |
| Hemiscyllium_henryi          | no  | leptobenthic  |
| Hemigaleus_australiensis     | no  | teuthitrophic |
| Hemigaleus_microstoma        | no  | teuthitrophic |
| Hemipristis_elongatus        | yes | littoral      |
| Hemiscyllium_freycineti      | no  | leptobenthic  |
| Hemiscyllium_hallstromi      | no  | leptobenthic  |
| Hemiscyllium_ocellatum       | no  | leptobenthic  |
| Hemiscyllium_strahani        | no  | leptobenthic  |
| Hemiscyllium_trispeculare    | no  | leptobenthic  |
| Hemitriakis_abdita           | no  | littoral      |
| Hemitriakis_complicofasciata | no  | littoral      |
| Hemitriakis_falcata          | no  | littoral      |
| Hemitriakis_indroyonoi       | yes | littoral      |
| Hemitriakis_japanica         | no  | littoral      |
| Hemitriakis_leucoperiptera   | no  | littoral      |
| Hemitriakis_spA              | no  | littoral      |
| Heptranchias_perlo           | no  | bathic        |
| Heterodontus_francisci       | no  | probenthic    |
| Heterodontus_galeatus        | no  | probenthic    |
| Heterodontus_japonicus       | no  | probenthic    |
| Heterodontus_mexicanus       | no  | probenthic    |
| Heterodontus_omanensis       | no  | probenthic    |
| Heterodontus_portusjacksoni  | no  | probenthic    |
| Heterodontus_quoyi           | no  | probenthic    |

Last & Stevens 2009 (Sharks and Rays of Australia, 2nd edition, Harvard University Press, Cambridge)

White et al. 2006 (Economically Important Sharks and Rays of Indonesia, Australian Centre for International Agricultural Research, Canberra)

|                             |     |                    |                                                                                                                                              |
|-----------------------------|-----|--------------------|----------------------------------------------------------------------------------------------------------------------------------------------|
| Heterodontus_ramalheira     | no  | probenthic         |                                                                                                                                              |
| Heterodontus_zebra          | no  | probenthic         |                                                                                                                                              |
| Heteroscymnoides_marleyi    | no  | microceanic        |                                                                                                                                              |
| Hexanchus_griseus           | no  | eurytrophic        |                                                                                                                                              |
| Hexanchus_nakamurai         | no  | bathic             |                                                                                                                                              |
| Holohalaelurus_favus        | no  | leptobenthic       |                                                                                                                                              |
| Holohalaelurus_grennian     | no  | leptobenthic       |                                                                                                                                              |
| Holohalaelurus_melanostigma | no  | leptobenthic       |                                                                                                                                              |
| Holohalaelurus_punctatus    | no  | leptobenthic       |                                                                                                                                              |
| Holohalaelurus_regani       | no  | leptobenthic       |                                                                                                                                              |
| Hypogaleus_hyugaensis       | no  | littoral           |                                                                                                                                              |
| lago_garricki               | no  | littoral           |                                                                                                                                              |
| lago_omanensis              | no  | anoxybathic        |                                                                                                                                              |
| lago_spA                    | no  | anoxybathic        |                                                                                                                                              |
| Isistius_brasiliensis       | no  | microceanic        |                                                                                                                                              |
| Isistius_labialis           | no  | microceanic        |                                                                                                                                              |
| Isistius_plutodus           | no  | microceanic        |                                                                                                                                              |
| Isogomphodon_oxyrhynchus    | no  | rhynchobathic      |                                                                                                                                              |
| Isurus_oxyrinchus           | yes | tachypelagic       | Clarke et al. 2006 (Ecol. Lett. 9:1115-1126)                                                                                                 |
| Isurus_paucus               | yes | tachypelagic       | Last & Stevens 2009 (Sharks and Rays of Australia, 2nd edition, Harvard University Press, Cambridge)                                         |
| Lamiopsis_temmincki         | no  | littoral           |                                                                                                                                              |
| Lamna_ditropis              | yes | tachypelagic       | Camhi et al. 2008 (In: Sharks of the Open Ocean, pp. 166-192, Blackwell, London)                                                             |
| Lamna_nasus                 | yes | tachypelagic       | Last & Stevens 2009 (Sharks and Rays of Australia, 2nd edition, Harvard University Press, Cambridge)                                         |
| Leptocharias_smithii        | no  | littoral           |                                                                                                                                              |
| Loxodon_macrorhinus         | yes | littoral           | White et al. 2006 (Economically Important Sharks and Rays of Indonesia, Australian Centre for International Agricultural Research, Canberra) |
| Megachasma_pelagios         | no  | macroceanic_filter |                                                                                                                                              |
| Miroscyllium_sheikoi        | no  | bathic             |                                                                                                                                              |
| Mitsukurina_owstoni         | no  | rhynchobathic      |                                                                                                                                              |
| Mollisquama_parini          | no  | bathic             |                                                                                                                                              |
| Mustelus_albipinnis         | no  | cancritrophic      |                                                                                                                                              |
| Mustelus_antarcticus        | no  | cancritrophic      |                                                                                                                                              |
| Mustelus_asterias           | no  | cancritrophic      |                                                                                                                                              |

|                         |     |               |
|-------------------------|-----|---------------|
| Mustelus_californicus   | no  | cancritrophic |
| Mustelus_canis          | no  | cancritrophic |
| Mustelus_dorsalis       | no  | cancritrophic |
| Mustelus_fasciatus      | no  | cancritrophic |
| Mustelus_griseus        | no  | cancritrophic |
| Mustelus_henlei         | no  | cancritrophic |
| Mustelus_higmani        | no  | cancritrophic |
| Mustelus_lenticulatus   | no  | cancritrophic |
| Mustelus_lunulatus      | no  | cancritrophic |
| Mustelus_manazo         | no  | cancritrophic |
| Mustelus_mento          | no  | cancritrophic |
| Mustelus_minicanis      | no  | cancritrophic |
| Mustelus_mosis          | no  | cancritrophic |
| Mustelus_mustelus       | no  | cancritrophic |
| Mustelus_norrisi        | no  | cancritrophic |
| Mustelus_palumbes       | no  | cancritrophic |
| Mustelus_punctulatus    | no  | cancritrophic |
| Mustelus_ravidus        | no  | cancritrophic |
| Mustelus_schmitti       | no  | cancritrophic |
| Mustelus_sinusmexicanus | no  | cancritrophic |
| Mustelus_sp1            | no  | cancritrophic |
| Mustelus_sp2            | no  | cancritrophic |
| Mustelus_sp3            | no  | cancritrophic |
| Mustelus_stevensi       | no  | cancritrophic |
| Mustelus_walkerii       | no  | cancritrophic |
| Mustelus_whitneyi       | no  | cancritrophic |
| Mustelus_widodoi        | no  | cancritrophic |
| Nasolamia_velox         | yes | littoral      |
| Nebrius_ferrugineus     | no  | littoral      |
| Negaprion_acutidens     | yes | eurytrophic   |
| Negaprion_brevirostris  | yes | eurytrophic   |
| Notorynchus_cepedianus  | no  | eurytrophic   |

Whoriskey (Bsc Thesis, Dalhousie University, Halifax)

Last & Stevens 2009 (Sharks and Rays of Australia, 2nd edition, Harvard University Press, Cambridge)

Compagno 2002 (In: The Living Marine Resources of the Western Central Atlantic, Vol. 1, FAO, Rome)

|                             |     |                 |
|-----------------------------|-----|-----------------|
| Odontaspis_ferox            | yes | bathic          |
| Odontaspis_noronhai         | yes | bathic          |
| Orectolobus_floridus        | no  | squatinobenthic |
| Orectolobus_halei           | no  | squatinobenthic |
| Orectolobus_hutchinsi       | no  | squatinobenthic |
| Orectolobus_japonicus       | no  | squatinobenthic |
| Orectolobus_maculatus       | no  | squatinobenthic |
| Orectolobus_ornatus         | no  | squatinobenthic |
| Orectolobus_parvimaclatus   | no  | squatinobenthic |
| Orectolobus_reticulatus     | no  | squatinobenthic |
| Orectolobus_wardi           | no  | squatinobenthic |
| Oxynotus_brunienseis        | no  | bathic          |
| Oxynotus_caribbaeus         | no  | bathic          |
| Oxynotus_centrina           | no  | bathic          |
| Oxynotus_japonicus          | no  | bathic          |
| Oxynotus_paradoxus          | no  | bathic          |
| Paragaleus_leucolomatus     | no  | littoral        |
| Paragaleus_pectoralis       | no  | teuthitrophic   |
| Paragaleus_randalli         | no  | littoral        |
| Paragaleus_tengi            | no  | littoral        |
| Parascyllium_collare        | no  | leptobenthic    |
| Parascyllium_elongatum      | no  | leptobenthic    |
| Parascyllium_ferrugineum    | no  | leptobenthic    |
| Parascyllium_sparsimaclatum | no  | leptobenthic    |
| Parascyllium_variolatum     | no  | leptobenthic    |
| Parmaturus_albimarginatus   | no  | bathic          |
| Parmaturus_albipenis        | no  | bathic          |
| Parmaturus_bigus            | no  | bathic          |
| Parmaturus_campechienseis   | no  | bathic          |
| Parmaturus_lanatus          | no  | bathic          |
| Parmaturus_macmillani       | no  | bathic          |
| Parmaturus_melanobranchius  | no  | bathic          |

Anderson & Ahmed 1993 (The Shark Fisheries in the Maldives, Ministry of Fisheries and Agriculture of the Maldives and FAO, Male), Last & Stevens 2009 (Sharks and Rays of Australia, 2nd edition, Harvard University Press, Cambridge)

Amorim et al. 1998 (Mar. Freshw. Res. 49:621-632)

|                                          |     |                    |                                                                                                                                                                                                                                                                                                  |
|------------------------------------------|-----|--------------------|--------------------------------------------------------------------------------------------------------------------------------------------------------------------------------------------------------------------------------------------------------------------------------------------------|
| <i>Parmaturus_pilosus</i>                | no  | bathic             |                                                                                                                                                                                                                                                                                                  |
| <i>Parmaturus_xaniurus</i>               | no  | anoxybathic        |                                                                                                                                                                                                                                                                                                  |
| <i>Pentanchus_profundicolus</i>          | no  | rhynchobathic      |                                                                                                                                                                                                                                                                                                  |
| <i>Pliotrema_warreni</i>                 | no  | pristobenthic      |                                                                                                                                                                                                                                                                                                  |
| <i>Poroderma_africanum</i>               | no  | probenthic         |                                                                                                                                                                                                                                                                                                  |
| <i>Poroderma_pantherinum</i>             | no  | probenthic         |                                                                                                                                                                                                                                                                                                  |
| <i>Prionace_glauca</i>                   | yes | macroceanic        | Clarke et al. 2006 (Ecol. Lett. 9:1115-1126)                                                                                                                                                                                                                                                     |
| <i>Pristiophorus_cirratus</i>            | no  | pristobenthic      |                                                                                                                                                                                                                                                                                                  |
| <i>Pristiophorus_delicatus</i>           | no  | pristobenthic      |                                                                                                                                                                                                                                                                                                  |
| <i>Pristiophorus_japonicus</i>           | no  | pristobenthic      |                                                                                                                                                                                                                                                                                                  |
| <i>Pristiophorus_nudipinnis</i>          | no  | pristobenthic      |                                                                                                                                                                                                                                                                                                  |
| <i>Pristiophorus_schroederi</i>          | no  | pristobenthic      |                                                                                                                                                                                                                                                                                                  |
| <i>Pristiophorus_spC</i>                 | no  | pristobenthic      |                                                                                                                                                                                                                                                                                                  |
| <i>Pristiophorus_spD</i>                 | no  | pristobenthic      |                                                                                                                                                                                                                                                                                                  |
| <i>Proscyllium_habereri</i>              | no  | leptobenthic       |                                                                                                                                                                                                                                                                                                  |
| <i>Proscyllium_magnificum</i>            | no  | leptobenthic       |                                                                                                                                                                                                                                                                                                  |
| <i>Proscymnodon_macracanthus</i>         | no  | bathic             |                                                                                                                                                                                                                                                                                                  |
| <i>Proscymnodon_plunketi</i>             | no  | bathic             |                                                                                                                                                                                                                                                                                                  |
| <i>Pseudocarcharias_kamoharai</i>        | no  | microceanic        |                                                                                                                                                                                                                                                                                                  |
| <i>Pseudoginglymostoma_brevicaudatum</i> | yes | littoral           | Nel et al. 2004 (IUCN Red List, IUCN)                                                                                                                                                                                                                                                            |
| <i>Pseudotriakis_microdon</i>            | no  | bathic             |                                                                                                                                                                                                                                                                                                  |
| <i>Rhincodon_typus</i>                   | yes | macroceanic_filter | Clarke 2004 (Shark Products Trade in Hong Kong and Mainland China and Implementation of the CITES Shark. Listings. TRAFFIC East Asia, Hong Kong)<br>White et al. 2006 (Economically Important Sharks and Rays of Indonesia, Australian Centre for International Agricultural Research, Canberra) |
| <i>Rhizoprionodon_acutus</i>             | yes | littoral           |                                                                                                                                                                                                                                                                                                  |
| <i>Rhizoprionodon_lalandii</i>           | no  | littoral           |                                                                                                                                                                                                                                                                                                  |
| <i>Rhizoprionodon_longurio</i>           | no  | littoral           |                                                                                                                                                                                                                                                                                                  |
| <i>Rhizoprionodon_oligolinx</i>          | yes | littoral           | White et al. 2006 (Economically Important Sharks and Rays of Indonesia, Australian Centre for International Agricultural Research, Canberra)                                                                                                                                                     |
| <i>Rhizoprionodon_porosus</i>            | no  | littoral           |                                                                                                                                                                                                                                                                                                  |
| <i>Rhizoprionodon_taylori</i>            | yes | littoral           | White et al. 2006 (Economically Important Sharks and Rays of Indonesia, Australian Centre for International Agricultural Research, Canberra)                                                                                                                                                     |
| <i>Rhizoprionodon_terraenovae</i>        | no  | littoral           |                                                                                                                                                                                                                                                                                                  |
| <i>Schroederichthys_bivius</i>           | no  | leptobenthic       |                                                                                                                                                                                                                                                                                                  |
| <i>Schroederichthys_chilensis</i>        | no  | leptobenthic       |                                                                                                                                                                                                                                                                                                  |

|                               |    |               |
|-------------------------------|----|---------------|
| Schroederichthys_maculatus    | no | leptobenthic  |
| Schroederichthys_saurisqualus | no | leptobenthic  |
| Schroederichthys_tenuis       | no | leptobenthic  |
| Scoliodon_laticaudus          | no | littoral      |
| Scyliorhinus_boa              | no | probenthic    |
| Scyliorhinus_canicula         | no | probenthic    |
| Scyliorhinus_capensis         | no | probenthic    |
| Scyliorhinus_cervigoni        | no | probenthic    |
| Scyliorhinus_comoroensis      | no | probenthic    |
| Scyliorhinus_garmani          | no | probenthic    |
| Scyliorhinus_haekelii         | no | probenthic    |
| Scyliorhinus_hesperius        | no | probenthic    |
| Scyliorhinus_meadii           | no | probenthic    |
| Scyliorhinus_retifer          | no | probenthic    |
| Scyliorhinus_spA              | no | probenthic    |
| Scyliorhinus_spB              | no | probenthic    |
| Scyliorhinus_stellaris        | no | probenthic    |
| Scyliorhinus_tokubee          | no | probenthic    |
| Scyliorhinus_torazame         | no | probenthic    |
| Scyliorhinus_torrei           | no | probenthic    |
| Scylliogaleus_quecketti       | no | cancritrophic |
| Scymnodalatias_albicauda      | no | bathic        |
| Scymnodalatias_garricki       | no | bathic        |
| Scymnodalatias_oligodon       | no | bathic        |
| Scymnodalatias_sherwoodi      | no | bathic        |
| Scymnodon_ringens             | no | bathic        |
| Somniosus_antarcticus         | no | eurytrophic   |
| Somniosus_longus              | no | bathic        |
| Somniosus_microcephalus       | no | eurytrophic   |
| Somniosus_pacificus           | no | eurytrophic   |
| Somniosus_rostratus           | no | bathic        |
| Somniosus_spA                 | no | bathic        |

|                       |     |                        |                                                 |
|-----------------------|-----|------------------------|-------------------------------------------------|
| Sphyrna_corona        |     | sphyrnid               |                                                 |
| Sphyrna_lewini        | yes | sphyrnid               | Clarke et al. 2006 (Ecol. Lett. 9:1115-1126)    |
| Sphyrna_media         | no  | sphyrnid               |                                                 |
| Sphyrna_mokarran      | yes | sphyrnid               | Clarke et al. 2006 (Ecol. Lett. 9:1115-1126)    |
| Sphyrna_spA           | yes | sphyrnid               | Quattro et al. 2006 (Mar. Biol. 148: 1143-1155) |
| Sphyrna_tiburo        | no  | sphyrnid_cancritrophic |                                                 |
| Sphyrna_tudes         | no  | sphyrnid               |                                                 |
| Sphyrna_zygaena       | yes | sphyrnid               | Clarke et al. 2006 (Ecol. Lett. 9:1115-1126)    |
| Squaliolus_aliae      |     | microceanic            |                                                 |
| Squaliolus_laticaudus | no  | microceanic            |                                                 |
| Squalus_acanthias     | no  | littoral               |                                                 |
| Squalus_albifrons     | no  | littoral               |                                                 |
| Squalus_altipinnis    | no  | littoral               |                                                 |
| Squalus_blainvillei   | no  | littoral               |                                                 |
| Squalus_bucephalus    | no  | littoral               |                                                 |
| Squalus_chloroculus   | no  | littoral               |                                                 |
| Squalus_crassispinus  | no  | littoral               |                                                 |
| Squalus_cubensis      | no  | littoral               |                                                 |
| Squalus_edmundsi      | no  | littoral               |                                                 |
| Squalus_grahami       | no  | littoral               |                                                 |
| Squalus_griffini      | no  | littoral               |                                                 |
| Squalus_hemipinnis    | no  | littoral               |                                                 |
| Squalus_japonicus     | no  | littoral               |                                                 |
| Squalus_lalannei      | no  | littoral               |                                                 |
| Squalus_megalops      | no  | littoral               |                                                 |
| Squalus_melanurus     | no  | littoral               |                                                 |
| Squalus_mitsukurii    | no  | littoral               |                                                 |
| Squalus_montalbani    | no  | littoral               |                                                 |
| Squalus_nasutus       | no  | littoral               |                                                 |
| Squalus_notocaudatus  | no  | littoral               |                                                 |
| Squalus_rancureli     | no  | littoral               |                                                 |
| Squalus_raulensis     | no  | littoral               |                                                 |

|                           |     |                 |
|---------------------------|-----|-----------------|
| Squalus_sp1               | no  | littoral        |
| Squalus_spA               | no  | littoral        |
| Squalus_spB               | no  | littoral        |
| Squatina_aculeata         | no  | squatinobenthic |
| Squatina_africana         | no  | squatinobenthic |
| Squatina_albipunctata     | no  | squatinobenthic |
| Squatina_argentina        | no  | squatinobenthic |
| Squatina_armata           | no  | squatinobenthic |
| Squatina_australis        | no  | squatinobenthic |
| Squatina_californica      | no  | squatinobenthic |
| Squatina_dumeril          | no  | squatinobenthic |
| Squatina_formosa          | no  | squatinobenthic |
| Squatina_guggenheim       | no  | squatinobenthic |
| Squatina_heteroptera      | no  | squatinobenthic |
| Squatina_japonica         | no  | squatinobenthic |
| Squatina_legnota          | no  | squatinobenthic |
| Squatina_mexicana         | no  | squatinobenthic |
| Squatina_nebulosa         | no  | squatinobenthic |
| Squatina_occulta          | no  | squatinobenthic |
| Squatina_oculata          | no  | squatinobenthic |
| Squatina_pseudocellata    | no  | squatinobenthic |
| Squatina_squatina         | no  | squatinobenthic |
| Squatina_tergocellata     | no  | squatinobenthic |
| Squatina_tergocellatoides | no  | squatinobenthic |
| Stegostoma_fasciatum      | no  | littoral        |
| Sutorectus_tentaculatus   | no  | squatinobenthic |
| Triaenodon_obesus         | yes | littoral        |
| Triakis_acutipinna        | no  | littoral        |
| Triakis_maculata          | no  | littoral        |
| Triakis_megalopterus      | no  | littoral        |
| Triakis_scyllium          | no  | littoral        |
| Triakis_semifasciata      | no  | littoral        |

Last & Stevens 2009 (Sharks and Rays of Australia, 2nd edition, Harvard University Press, Cambridge)



|                           |    |        |
|---------------------------|----|--------|
| Trigonognathus_kabeyai    | no | bathic |
| Zameus_ichiharai          | no | bathic |
| Zameus_squamulosus        | no | bathic |
| <u>Zameus_squamulosus</u> | no | bathic |

---
